# Supplementary material for: Beneficial effects of tea water extracts on the body weight and gut microbiota in C57BL/6J mice fed with a high-fat diet
Source: Royal Society of Chemistry journal article supplement (doi:10.1039/c8fo02051e), 2019-01-01
Supplement: c8fo02051e1.pdf [file c8fo02051e1.pdf]

## Supporting Information

**Table S1.** Diet compositions

|                                 | LFD   | HFD   | GTWE  | BTWE  | OTWE  |
|---------------------------------|-------|-------|-------|-------|-------|
| Ingredients (g)                 |       |       |       |       |       |
| Corn starch                     | 600.2 | 346.0 | 346.0 | 346.0 | 346.0 |
| Gelatin                         | 20.0  | 20.0  | 20.0  | 20.0  | 20.0  |
| Casein                          | 140.0 | 140.0 | 140.0 | 140.0 | 140.0 |
| Sucrose                         | 100.0 | 59.0  | 59.0  | 59.0  | 59.0  |
| Powdered cellulose              | 50.0  | 50.0  | 50.0  | 50.0  | 50.0  |
| Lard                            | 40.0  | 171.0 | 171.0 | 171.0 | 171.0 |
| AIN 76 Mineral Mix              | 35.0  | 35.0  | 35.0  | 35.0  | 35.0  |
| AIN 93 Vitamin Mix              | 10.0  | 10.0  | 10.0  | 10.0  | 10.0  |
| Choline Bitartrate              | 2.5   | 2.5   | 2.5   | 2.5   | 2.5   |
| DL-Methionine                   | 2.3   | 2.3   | 2.3   | 2.3   | 2.3   |
| Cholesterol                     | 0.0   | 8.4   | 8.4   | 8.4   | 8.4   |
| GTWE                            | -     | -     | 8.4   | -     | -     |
| BTWE                            | -     | -     | -     | 8.4   | -     |
| OTWE                            | -     | -     | -     | -     | 8.4   |
| Total energy, KJ                | 3850  | 3850  | 3850  | 3850  | 3850  |
| Calculated energy content, KJ/g | 3.85  | 4.56  | 4.51  | 4.51  | 4.51  |
| Energy %                        |       |       |       |       |       |
| Carbohydrates                   | 72.7  | 43.1  | 43.1  | 43.1  | 43.1  |
| Protein                         | 16.9  | 16.9  | 16.9  | 16.9  | 16.9  |
| Fat                             | 9.4   | 40.0  | 40.0  | 40.0  | 40.0  |

Mice were fed with low fat diet (LFD), high fat diet (HFD), and HFD supplemented with 1% of green tea (GTWE), oolong tea (OTWE), and black tea (BTWE) diets.

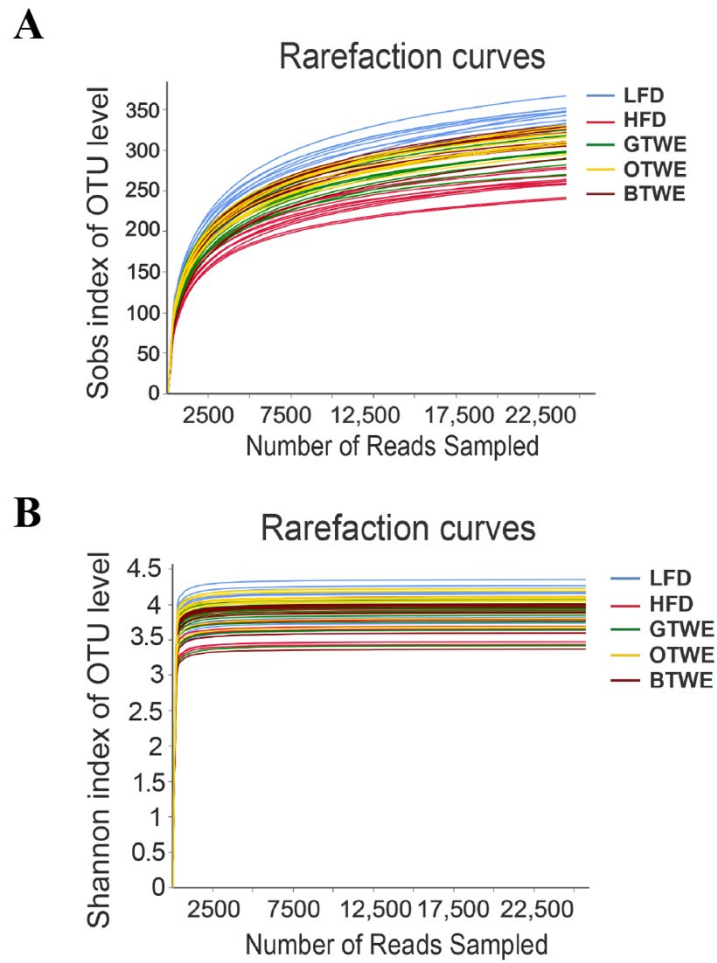

**Figure S1.** Alpha diversity analysis of fecal samples for mice fed with low fat diet (LFD), high fat diet (HFD), and HFD supplemented with green tea (GTWE), oolong tea (OTWE), and black tea (BTWE) diets. A) Rarefaction analysis (Sobs index). B) Rarefaction analysis (Shannon index).

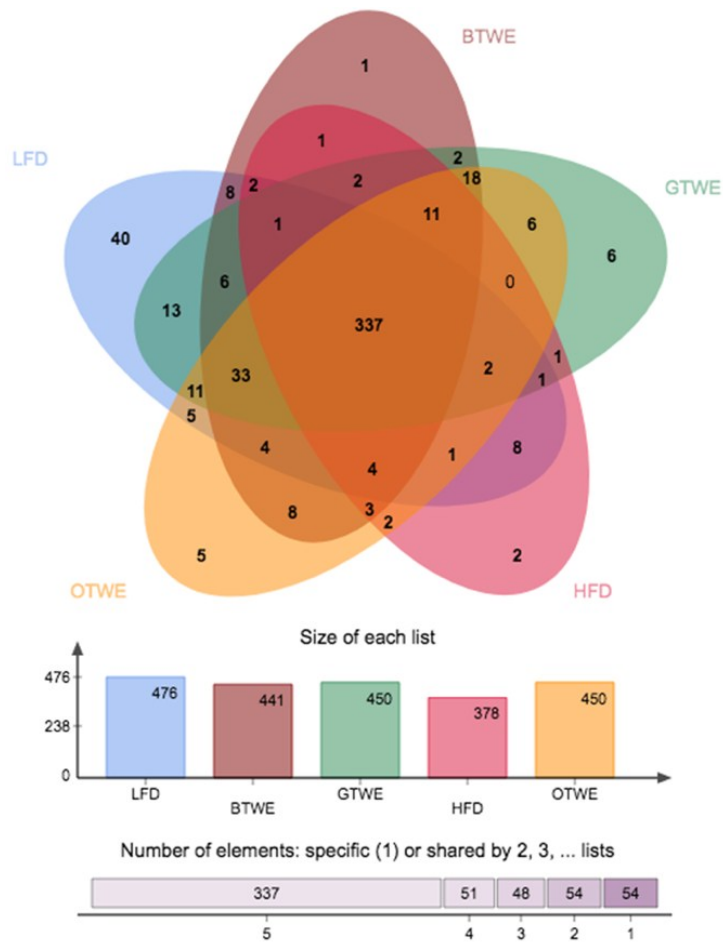

**Figure S2.** Quantitative comparisons of bacterial OTUs among the five groups fed one of the five diets, a low fat diet (LFD), a high fat diet (HFD), and a HFD supplemented with green tea (GTWE), oolong tea (OTWE), and black tea water extracts (BTWE). The number in the overlapped ellipses indicated the OTUs shared among different groups. Total abundances of each group were analyzed to assess changes in gut microbiota.

### LefSe Bar

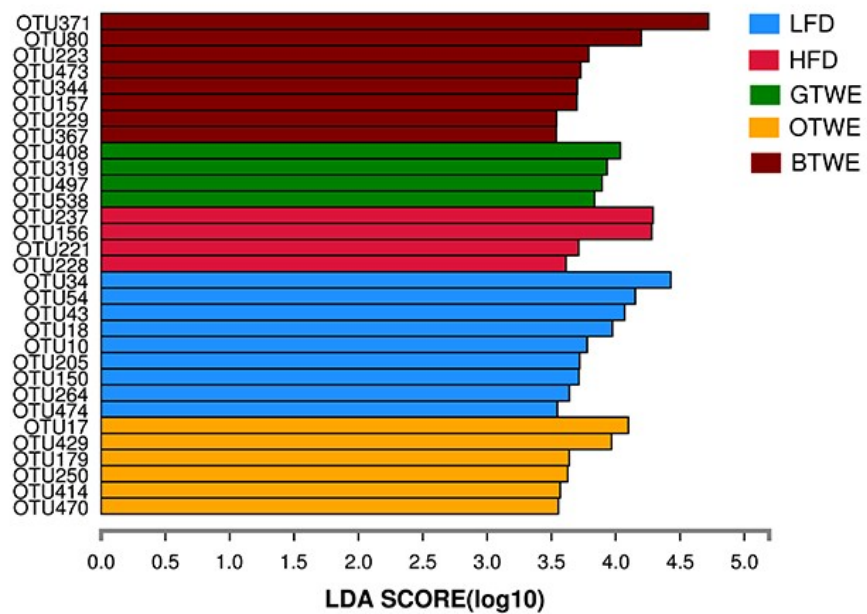

**Figure S3.** Linear discriminant analysis (LDA) coupled with effect size (LEfSe) analysis among all groups. Threshold of LDA = 3.5. The enriched taxa are displayed with a positive LDA score. Only taxa meeting an LDA score threshold  $\geq 3.5$  are listed.

Table S2. Taxonomic information of 31 key OTUs.

| OTU    | Phylum         | Class               | Order              | Family                        | Genus                                          |
|--------|----------------|---------------------|--------------------|-------------------------------|------------------------------------------------|
| OTU371 | Bacteroidetes  | Bacteroidia         | Bacteroidales      | Bacteroidales_S24-7_group     | <i>norank_f__Bacteroidales_S24-7_group</i>     |
| OTU80  | Bacteroidetes  | Bacteroidia         | Bacteroidales      | Bacteroidales_S24-7_group     | <i>norank_f__Bacteroidales_S24-7_group</i>     |
| OTU17  | Firmicutes     | Clostridia          | Clostridiales      | Lachnospiraceae               | <i>Lachnospiraceae_NK4A136_group</i>           |
| OTU34  | Firmicutes     | Erysipelotrichia    | Erysipelotrichales | Erysipelotrichaceae           | <i>Faecalibaculum</i>                          |
| OTU54  | Bacteroidetes  | Bacteroidia         | Bacteroidales      | Bacteroidales_S24-7_group     | <i>norank_f__Bacteroidales_S24-7_group</i>     |
| OTU473 | Bacteroidetes  | Bacteroidia         | Bacteroidales      | Rikenellaceae                 | <i>Alistipes</i>                               |
| OTU237 | Firmicutes     | Clostridia          | Clostridiales      | Ruminococcaceae               | <i>[Eubacterium]_coprostanoligenes_group</i>   |
| OTU408 | Firmicutes     | Clostridia          | Clostridiales      | Lachnospiraceae               | <i>Blautia</i>                                 |
| OTU497 | Proteobacteria | Deltaproteobacteria | Desulfovibrionales | Desulfovibrionaceae           | <i>Bilophila</i>                               |
| OTU429 | Firmicutes     | Clostridia          | Clostridiales      | Lachnospiraceae               | <i>Lachnospiraceae_NK4A136_group</i>           |
| OTU319 | Bacteroidetes  | Bacteroidia         | Bacteroidales      | Rikenellaceae                 | <i>Rikenellaceae_RC9_gut_group</i>             |
| OTU414 | Firmicutes     | Clostridia          | Clostridiales      | Ruminococcaceae               | <i>Ruminiclostridium_9</i>                     |
| OTU221 | Firmicutes     | Clostridia          | Clostridiales      | Lachnospiraceae               | <i>norank_f__Lachnospiraceae</i>               |
| OTU223 | Firmicutes     | Clostridia          | Clostridiales      | Peptostreptococcaceae         | <i>Romboutsia</i>                              |
| OTU228 | Bacteroidetes  | Bacteroidia         | Bacteroidales      | Bacteroidales_S24-7_group     | <i>norank_f__Bacteroidales_S24-7_group</i>     |
| OTU156 | Bacteroidetes  | Bacteroidia         | Bacteroidales      | Rikenellaceae                 | <i>Alistipes</i>                               |
| OTU250 | Bacteroidetes  | Bacteroidia         | Bacteroidales      | Bacteroidales_S24-7_group     | <i>norank_f__Bacteroidales_S24-7_group</i>     |
| OTU229 | Bacteroidetes  | Bacteroidia         | Bacteroidales      | Rikenellaceae                 | <i>Rikenella</i>                               |
| OTU179 | Firmicutes     | Clostridia          | Clostridiales      | Ruminococcaceae               | <i>Ruminiclostridium</i>                       |
| OTU43  | Actinobacteria | Actinobacteria      | Bifidobacteriales  | Bifidobacteriaceae            | <i>Bifidobacterium</i>                         |
| OTU18  | Firmicutes     | Bacilli             | Lactobacillales    | Lactobacillaceae              | <i>Lactobacillus</i>                           |
| OTU344 | Firmicutes     | Clostridia          | Clostridiales      | Ruminococcaceae               | <i>Ruminiclostridium</i>                       |
| OTU264 | Firmicutes     | Clostridia          | Clostridiales      | Lachnospiraceae               | <i>Acetatifactor</i>                           |
| OTU367 | Firmicutes     | Clostridia          | Clostridiales      | Clostridiales_vadinBB60_group | <i>norank_f__Clostridiales_vadinBB60_group</i> |
| OTU538 | Firmicutes     | Clostridia          | Clostridiales      | Ruminococcaceae               | <i>Ruminiclostridium_9</i>                     |
| OTU205 | Firmicutes     | Clostridia          | Clostridiales      | Lachnospiraceae               | <i>Lachnospiraceae_NK4A136_group</i>           |
| OTU157 | Firmicutes     | Erysipelotrichia    | Erysipelotrichales | Erysipelotrichaceae           | <i>Turicibacter</i>                            |
| OTU10  | Bacteroidetes  | Bacteroidia         | Bacteroidales      | Rikenellaceae                 | <i>Alistipes</i>                               |
| OTU470 | Firmicutes     | Clostridia          | Clostridiales      | Lachnospiraceae               | <i>Roseburia</i>                               |
| OTU150 | Tenericutes    | Mollicutes          | Anaeroplasmatales  | Anaeroplasmataceae            | <i>Anaeroplasma</i>                            |
| OTU474 | Bacteroidetes  | Bacteroidia         | Bacteroidales      | Rikenellaceae                 | <i>Alistipes</i>                               |
